1 **Original Article**

2 **Title:** Treatment interruption is a risk factor for sickness presenteeism: a large-scale cross-sectional  
3 study during the COVID-19 pandemic

4

5 Makoto Okawara<sup>1</sup>, M.D., Tomohiro Ishimaru<sup>1</sup>, M.D., M.P.H., Ph.D., Seiichiro Tateishi<sup>2</sup>, M.D., Ph.D.,

6 Ayako Hino<sup>3</sup>, M.D., Ph.D., Mayumi Tsuji<sup>4</sup>, M.D., Ph.D., Akira Ogami<sup>5</sup>, M.D., Ph.D., Tomohisa

7 Nagata<sup>6</sup>, M.D., Ph.D., Shinya Matsuda<sup>7</sup>, M.D., Ph.D., Yoshihisa Fujino<sup>1</sup>, M.D., M.P.H., Ph.D., for

8 the CORoNaWork project

9

10 **Author contributions:** Y.F. planned the overall survey; all authors designed the research protocol  
11 and questionnaire; M.O. handled the data and conducted statistical analysis with Y.F.; M.O. drafted  
12 the initial manuscript; all authors revised and approved the final manuscript.

13

14 **Authors' affiliations:**

15 1 Department of Environmental Epidemiology, Institute of Industrial Ecological Sciences,

16 University of Occupational and Environmental Health, Japan

17 2 Department of Occupational Medicine, School of Medicine, University of Occupational and

18 Environmental Health, Japan

19 3 Department of Mental Health, Institute of Industrial Ecological Sciences, University of

20 Occupational and Environmental Health, Japan

21 4 Department of Environmental Health, School of Medicine, University of Occupational and

22 Environmental Health, Japan

23 5 Department of Work Systems and Health, Institute of Industrial Ecological Sciences, University of

24 Occupational and Environmental Health, Japan

25 6 Department of Occupational Health Practice and Management, Institute of Industrial Ecological

26 Sciences, University of Occupational and Environmental Health, Japan

27 7 Department of Preventive Medicine and Community Health, School of Medicine, University of

28 Occupational and Environmental Health, Japan

29

30 **Corresponding author:**

31 Makoto Okawara, M.D.

32 Department of Environmental Epidemiology, Institute of Industrial Ecological Sciences, University

33 of Occupational and Environmental Health, Japan

34 1-1, Iseigaoka, Yahatanishiku, Kitakyushu, 807-8555, Japan

35 Tel: +81-93-691-7401

36 E-mail: [makotouoeh@med.uoeh-u.ac.jp](mailto:makotouoeh@med.uoeh-u.ac.jp)

37 **Abstract**

38 **Objectives:** This study examined the relationship between interruption to routine medical care  
39 during the coronavirus disease 2019 pandemic and sickness presenteeism among workers in Japan.

40 **Methods:** A cross-sectional study using data obtained from an internet monitor questionnaire was  
41 conducted. Interruption to medical care was defined based on the response “I have not been able to  
42 go to the hospital or receive treatment as scheduled.” The fraction of sickness presenteeism days in  
43 the past 30 days was employed as the primary outcome. A fractional logit model was used for  
44 analysis to treat bounded data.

45 **Results:** Of the 27,036 participants, 17,526 (65%) were workers who did not require routine medical  
46 care, 8,451 (31%) were using medical care as scheduled, and 1,059 (4%) experienced interrupted  
47 medical care. The adjusted odds ratio (aOR) of sickness presenteeism was significantly higher  
48 among workers who experienced interrupted medical care (3.44; 95% confidence interval [CI]:  
49 3.04–3.89) than those who did not require routine medical care. In terms of symptoms, the highest  
50 aOR was observed among workers with mental health symptoms (aOR: 5.59, 95% CI: 5.04–6.20).

51 **Conclusions:** This study suggests the importance of continuing necessary treatment during a  
52 pandemic to prevent presenteeism.

53 **Keywords:** occupational health; patient dropouts; presenteeism; COVID-19; regression analysis

54

55 **Introduction**

56           Sickness presenteeism is an increasingly important issue in occupational health. Aronsson  
57 defined sickness presenteeism as “people, despite complaints and ill health that should prompt rest  
58 and absence from work, still turning up at their jobs”<sup>1</sup>. Sickness presenteeism is the result of a choice  
59 made by a worker with ill-health, disease, or capacity loss between sickness presenteeism and  
60 sickness absence<sup>2</sup>. This decision is influenced by the individual's personality, values, economic  
61 status, workplace “demands for presence” and support for adaptation, and national culture and  
62 employment customs<sup>2</sup>. Evidence suggests that sickness presenteeism can lead to sickness absence  
63 and future worsening of physical and mental health conditions<sup>3-9</sup>. In addition, the impact of working  
64 while ill on productivity is also gaining attention, especially in North America<sup>10,11</sup>. A variety of  
65 diseases and health conditions have been found to be associated with sickness presenteeism,  
66 suggesting the importance of managing disease and maintaining good condition<sup>4,12</sup>.

67           Under the coronavirus disease 2019 (COVID-19) pandemic, there is concern that both  
68 organizational and individual factors will increase sickness presenteeism above that observed under  
69 normal conditions<sup>13-15</sup>. Increased workload on workers can lead to a negative work culture around  
70 taking sick leave, such as where workers who choose to work while ill are valued for their loyalty to  
71 the company and motivation to work, thus promoting sickness presenteeism<sup>16</sup>. Examples of

72 individual factors that may increase sickness presenteeism include worsening economic situations  
73 and job insecurity; increased telecommuting, which can make it easier for workers to work even  
74 while sick; the impact of the pandemic on anxiety and mental health; worsening of health conditions  
75 and diseases due to lifestyle changes; and worsening of chronic diseases due to the inability to access  
76 medical resources. All of these factors are expected to lead to an increase in sickness presenteeism.

77 Interruption to medical care is an important problem in the COVID-19 pandemic. Access to  
78 necessary routine medical care and medical resources is reportedly being affected in many countries  
79 around the world<sup>17-19</sup>. In Japan, there is data showing that the number of prescriptions issued has  
80 decreased<sup>20</sup>. Interruption to medical care can adversely affect management of chronic diseases and  
81 delay the detection and treatment of new diseases<sup>22</sup>. In fact, excess deaths unrelated to COVID-19  
82 have been reported<sup>23</sup>. Thus, interruption to medical care during the COVID-19 pandemic may lead to  
83 worsening of non-COVID-19 diseases and health conditions.

84 During the COVID-19 pandemic, the number of people working while ill may increase as a  
85 result of worsening health conditions arising from treatment interruptions and delays. This may  
86 result in an increase in sickness presenteeism. However, few studies have examined the effect of  
87 medical care interruption on sickness presenteeism during the COVID-19 pandemic. We  
88 hypothesized that sickness presenteeism has increased among workers who experienced

89 interruptions to their medical care during the COVID-19 pandemic. The purpose of this study was to  
90 examine the association between medical care interruption and sickness presenteeism in Japanese  
91 workers during the COVID-19 pandemic.

92

### 93 **Materials and Methods**

94 We performed a cross-sectional study based on baseline survey data obtained in the  
95 Collaborative Online Research on the Novel- Coronavirus and Work (CORoNaWork) project, a  
96 prospective cohort study that performed a questionnaire-based survey of Internet monitors to  
97 determine the effect of the COVID-19 pandemic on workers' health. Details of the study protocol are  
98 published elsewhere<sup>23</sup>. The practical aspects of the survey, namely recruitment, data sampling, initial  
99 data clean-up, and management of respondents' **user identifications (IDs)** for tracking cohort data,  
100 were conducted by Cross Marketing Inc. (Tokyo, Japan), which has 4.7 million registered monitors.  
101 Before completing the online survey, participants read a description of the survey's aims and details  
102 about the handling of their information. Only participants who agreed with the contents of the  
103 description were allowed to participate. Participants' **user IDs** were stored by the survey company.  
104 To participate in surveys offered by the survey company, users had to register in advance. Once  
105 registered, participants were given a **user ID** to use when completing online surveys. Thus, all

106 surveys were conducted anonymously. The survey company assigned each respondent a unique  
107 number that would be used only within this study to merge the data from the first and subsequent  
108 surveys, based on the user ID within the survey company. The user ID is not provided to the  
109 researcher, but the unique number enabled the researcher to merge the data and create the cohort  
110 data. Participants' personal data were anonymized prior to receipt by the researchers, and were  
111 protected based on the survey company's privacy policy. This study was approved by the Ethics  
112 Committee of the University of Occupational and Environmental Health, Japan (Approval No.  
113 R2-079 and R3-006).

114 The baseline survey was conducted from December 22 to 26, 2020. A total of 605,381  
115 registered monitors were emailed invitations to participate. Sampling was designed such that sex and  
116 occupation (office and non-office workers) were approximately equal among the five regions of  
117 residence. Specifically, we predetermined a total of 20 units comprising five regions of residence,  
118 two sexes, and two occupations. Sampling was continued until each unit reached 1500 responses  
119 plus a margin of 10%, after which the unit was closed to participation. We devised the five regions  
120 of residence according to infection and geographic status: first, Japan's 47 prefectures were divided  
121 into four categories based on the cumulative COVID-19 infection rate; second, the category with the  
122 highest infection rate was further divided into Kanto and non-Kanto regions. A total of 55,045  
123 participants answered the initial screening questions, of whom 33,302 matched the survey's criteria

124 (worker status, region of residence, sex, and age). Participants answered one questionnaire item per  
125 page, with the overall questionnaire containing 55 pages. Participants could review and change their  
126 responses using the back button. Participants who provided fraudulent responses (n=6,266)  
127 according to the survey company or a predefined definition of a fraudulent response were excluded.  
128 Fraudulent responses included an unusually short response time (below 6 minutes), unusually short  
129 height (below 140 cm), unusually low weight (below 30 kg), varying answers to similar questions in  
130 the survey (e.g., varying answers to questions about marital status or area of residence), and  
131 incorrect answers to tiered questions used to identify inappropriate responses (e.g., choose the third  
132 highest number from the following five numbers). After exclusion, responses from 27,036  
133 participants aged from 20 and 65 years who indicated they were working when completing the  
134 survey were ultimately included in the analysis.

135

136 Assessment of treatment status

137 We assessed the presence of disease and use of medical care using the following question:  
138 “Do you have a disease that requires regular visits to the hospital or treatment?” Responses were “I  
139 do not have any such disease”; “I am able to go to the hospital or receive treatment as scheduled”; “I  
140 have not been able to go to the hospital or receive treatment as scheduled.”



141           Those who answered “I do not have any such disease” were defined as workers who did not  
142   require routine medical care, and thus did not have any disease that requires hospital visits or  
143   treatment. Those who answered “I am able to go to the hospital or receive treatment as scheduled”  
144   were defined as workers who used medical care. Those who answered “I have not been able to go to  
145   the hospital or receive treatment as scheduled” were defined as workers who experienced interrupted  
146   medical care.

147

148   Assessment of sickness presenteeism and other covariates

149           Respondents’ number of sickness presenteeism days was ascertained based on the following  
150   question and used as the primary outcome: “In the last 30 days, how many days have you worked  
151   (including work from home) despite feeling that you really should have taken sick leave due to your  
152   state of health?”<sup>2</sup> According to a previous study, the target period for sickness presenteeism can  
153   range from four weeks to 12 months.<sup>24</sup> We chose a target period of 30 days to reduce the effects of  
154   recall bias and changes in the COVID-19 pandemic situation in Japan.

155           Socioeconomic and work-related factors included sex, age, job type (mainly desk work,  
156   mainly interpersonal communication, mainly physical work), marital status (married,  
157   divorced/deceased, never married), equivalent income (household income divided by the square root

158 of the number of people in the household), education (junior high school, high school, vocational  
159 school/junior college/college of technology, university/graduate school), frequency of working from  
160 home (at least one day a month, at least one day a week, at least two days a week, at least four days a  
161 week), company size (total number of employees in the respondent's main place of work [1 for  
162 self-employed]), presence of a policy by the employer requesting that employees refrain from  
163 attending work while ill (yes or no), and the number of days worked per week.

164 The cumulative infection rate of COVID-19 in the province of residence was employed as a  
165 community-level variable.

166 To control for potential confounders, we also asked participants to indicate their main  
167 symptoms using the following question: "Which of the following conditions or body parts give you  
168 the most trouble during your work?" The options were "No problem"; "pain"; "movement";  
169 "tightness, loss of energy, appetite, fever, dizziness, or feeling poor"; "toileting or elimination";  
170 "mental health"; "skin, hair, or beauty"; "sleep"; "eyes"; "nose"; "ears"; and "other."

171

172 Statistical analysis

173           Age was treated as a continuous variable and reported as mean and standard deviation (SD).

174   The number of sickness presenteeism days was treated as a discrete variable and converted to a  
175   fractional response variable by dividing by the maximum value of 30 days. Categorical variables  
176   were reported as number and percentage. Equivalent income was categorized into quartiles.

177           We compared the results of Poisson regression, Zero-inflated Poisson regression (ZIP),  
178   negative binomial regression, Zero-inflated Negative Binomial regression (ZINB), and fractional  
179   logistic regression as statistical models. To handle data with excess zeros, which indicates a  
180   population at low risk of sickness presenteeism, we considered a zero-inflated model<sup>24</sup>. Fractional  
181   logistic regression<sup>26</sup> was also considered because the maximum possible number of days of sickness  
182   presenteeism was 30, allowing the data to be treated as bounded data. As a measure of model fitness,  
183   we compared the Akaike's Information Criterion (AIC), and ultimately adopted the fractional logit  
184   model.

185           Fractional logistic regression analysis was conducted with the fraction of sickness  
186   presenteeism days in last 30 days (0 indicates 0 days of sickness presenteeism; 1 indicates 30 days of  
187   sickness presenteeism) as the dependent variable and the respondents' category of treatment status as  
188   an independent variable.

189           We adjusted for the following potential confounders: sex, age, job type, marital status,  
190   equivalent income, education, frequency of working from home, company size, cumulative infection  
191   rate by prefecture, main symptoms, presence of a policy by the employer requesting that employees  
192   refrain from attending work while ill, and the number of days worked per week.

193           In further analysis, we estimated the margins of sickness presenteeism days for each  
194   treatment status and symptom. First, we used the same statistical model as that in the main analysis.  
195   Second, we calculated the predictive margins of sickness presenteeism days, substituting measured  
196   values for other covariates, dividing the data into 36 groups (3 treatment statuses and 12  
197   symptoms)<sup>27</sup>. In the fractional logit model, because predictive margins were calculated as fractions,  
198   we multiplied margins and standard errors by 30 to obtain predictive margins for sickness  
199   presenteeism days in the last 30 days. Preliminarily, we confirmed the simple main effects for each  
200   treatment status compared to workers who did not require routine medical care by adding the  
201   interaction term between treatment status and symptoms to the model used for the main analysis. For  
202   all analyses, the Bonferroni method was used to adjust for multiple comparisons.

203           All comparisons were performed in Stata (Stata Statistical Software: Release 16; StataCorp  
204   LLC, TX, USA), with  $p < 0.05$  indicating statistical significance.

205

206 **Results**

207           The demographic and sociological characteristics of the analyzed population are shown in  
208 Table 1. A total of 13,814 (51%) were men, and the mean age was 47.0 years (SD: 10.5). Of the total  
209 population, 17,526 (65%) were workers who did not require routine medical care, 8,451 (31%) were  
210 using medical care as scheduled, and 1,059 (4%) experienced interrupted medical care. The  
211 distribution of sickness presenteeism is shown for the three treatment statuses in a histogram in  
212 Figure 1. While the majority of respondents reported zero days of sickness presenteeism, a large  
213 number also selected the maximum of 30 days. There were also small clusters at 5, 10, and 20 days,  
214 which may be due to digit preference.

215           The association between treatment status and the fraction of sickness presenteeism days is  
216 shown in Table 2. There was a significant association between the fraction of sickness presenteeism  
217 days and treatment status. After adjusting for other covariates in the multivariate model, the odds  
218 ratio (aOR) of sickness presenteeism days was significantly higher among workers who used  
219 medical care (aOR: 1.36, 95%CI: 1.26–1.46,  $p<0.001$ ) and workers who experienced interrupted  
220 medical care (aOR: 3.28, 95%CI: 2.93–3.67,  $p<0.001$ ) compared to workers who did not require  
221 routine medical care.

222           The association between participants' main symptoms and the fraction of sickness  
223 presenteeism days is shown in Table 3. There were significant associations between the fraction of  
224 sickness presenteeism days and some symptoms using the model presented in Table 2. The highest  
225 OR of sickness presenteeism days was observed for mental health symptoms (aOR: 5.35, 95% CI:  
226 4.85–5.91,  $p<0.001$ ).

227           The predictive margins of sickness presenteeism days for each treatment status and  
228 symptom are shown in Table 4 and Figure 2. When the analysis was performed based on the three  
229 treatment statuses, irrespective of symptom, the predictive margin of sickness presenteeism days  
230 among workers who experienced interrupted medical care was 6.6 days (standard error [SE]=0.25),  
231 while that among workers who did not require routine medical care was 1.4 days (SE=0.03). When  
232 the analysis was performed based on the 36 treatment-symptom groups (3 treatment statuses and 12  
233 symptoms), the largest predictive margin of sickness presenteeism days was observed for mental  
234 health symptoms AND interrupted medical care (predictive margin: 9.9 days, SE=0.38). The simple  
235 effect comparisons test, which included the interaction term between treatment status and symptoms,  
236 showed that there were significant differences between workers with the same symptoms who did  
237 and did not require routine medical care, and between workers with the same symptoms who  
238 experienced interruption to medical care and who did not require routine medical care. For example,  
239 the fraction of sickness presenteeism days significantly differed between those with mental health

240 symptoms who used medical care and those with mental health symptoms who did not require  
241 routine medical care ( $p<0.001$ ).

242

## 243 **Discussion**

244 This study demonstrated an association between treatment interruption and sickness  
245 presenteeism among Japanese workers during the country's third wave of the COVID-19 pandemic.  
246 Compared to workers who did not require routine medical care, workers who had diseases that  
247 required routine medical care reported more days of sickness presenteeism, and those who  
248 experienced interrupted medical care reported even more such days. Furthermore, our findings  
249 revealed that there may be some symptoms that are more likely to lead to sickness presenteeism.

250 We found that workers who experienced interrupted medical care had increased sickness  
251 presenteeism. This is because appropriate treatment can improve work function and productivity by  
252 improving workers' health and subjective symptoms<sup>10,28</sup>. Employees who experience interrupted  
253 treatment for chronic diseases may be forced to return to work due to fear of being laid off,  
254 depending on the financial situation of their workplace during the pandemic. It is important to  
255 continue regular treatments to manage disease and maintain health<sup>29</sup> to prevent inappropriate  
256 presence at work while ill.

257 We found that the proportion of sickness presenteeism days varies by the type of symptoms  
258 experienced by workers. While ORs among workers with symptoms related to mental health  
259 problems, loss of energy/fever, body movement, and sleep were high, those among workers with  
260 nose and skin, hair, beauty symptoms were moderate. Sickness presenteeism is the result of a  
261 worker's choice to attend work despite being unwell rather than being absent from work. Many  
262 previous studies conducted mainly in Europe have evaluated "sickness presenteeism" as a health  
263 behavior based on whether or not workers "worked one or more days in a certain period of time with  
264 a health condition for which they think they really should be absent"<sup>2,30</sup>. This is in contrast to studies  
265 of "presenteeism" in North America, where the concept is evaluated as productivity loss due to  
266 illness or a health condition using the Work Limitations Questionnaire or other tools<sup>10,31</sup>. One reason  
267 as to why sickness presenteeism is more likely to be reported by workers experiencing mental health  
268 problems may be that these symptoms are severe enough to cause "health conditions for which they  
269 think they really should be absent." In contrast, physical symptoms such as those of allergic rhinitis  
270 may not be considered "health conditions for which they think they really should be absent"  
271 regardless of severity. If workers themselves do not consider their symptoms to be "health conditions  
272 for which they think they really should be absent," they may not report experiencing sickness  
273 presenteeism. However, there may be cases in which workers do not deem it necessary to be absent  
274 from work, despite having a symptom that reduces productivity. Allergies with nose-related



275 symptoms are one example that causes loss of productivity due to presenteeism<sup>11,32</sup>. Workers may  
276 not link these symptoms to sickness presenteeism due to differences in interpretation of “health  
277 conditions that require absence from work.” This is an important point when evaluating “sickness  
278 presenteeism” as a health behavior.

279 We also found that the impact of continuing treatment on the prevention of sickness  
280 presenteeism varied by symptom. Sickness presenteeism was more frequent in workers with  
281 treatment interruption and symptoms related to pain, tightness and loss of energy, toileting and  
282 elimination, mental health, sleep, and eyes than those who did not require routine medical care.  
283 Among those who reported toileting and elimination, sleep, and eye symptoms, there was no  
284 difference in sickness presenteeism between workers who used medical care and those who did not  
285 require routine medical care. This suggests the importance of continuing necessary routine medical  
286 care for preventing sickness presenteeism due to these symptoms. For those with pain, tightness and  
287 loss of energy, and mental health symptoms, sickness presenteeism remained high even with  
288 continued treatment, indicating the need to identify appropriate treatment and manage one’s daily  
289 health condition in addition to continuing treatment. Meanwhile, the prevalence of sickness  
290 presenteeism was comparable among treatment statuses for participants with movement and mobility,  
291 nose, and ear symptoms. This may be because individuals may not consider these symptoms  
292 sufficiently adverse to engage in sickness presenteeism, or may experience chronic symptoms for

293 which support and adaptive behaviors have already been put into place such as movement symptoms.  
294 The impact of continuing treatment on sickness presenteeism may be related to whether an  
295 individual considers their symptoms to be sufficiently adverse to require an absence from work, or  
296 whether or not the symptoms can be improved with treatment.

297         There are several limitations to this study. First, since this study is a survey of Internet  
298 monitors, limitations regarding selection bias and generalizability are unavoidable. To reduce  
299 potential bias, sampling and recruitment were conducted according to occupation and sex in each  
300 region and the COVID-19 infection rate. To understand the characteristics of the target population of  
301 this survey, we compared the results with those of national surveys and occupational surveys using  
302 various batteries<sup>23</sup>. Second, we did not obtain detailed information related to treatment interruptions,  
303 including the type of disease, duration, and reasons for interruption. We were thus unable to  
304 determine whether the reason for interruption to treatment was due to patient-related reasons (e.g.,  
305 economic situation and anxiety) or hospital-related reasons (e.g., schedule adjustment). Additionally,  
306 the questions we used to identify exposure factors were related to the presence or absence of diseases  
307 that require hospital visits and use of medical care. However, sickness presenteeism is not just  
308 related to disease and medical status, but also a wide range of health conditions or concerns. Third,  
309 interruptions to treatment may be the result of better disease control and improved health. It is  
310 unclear how these factors would affect the occurrence of sickness presenteeism. Fourth, because this

311 study examined sickness presenteeism among workers during the third wave of the COVID-19  
312 pandemic in Japan, caution is needed when interpreting the results. Further, causality is unclear. For  
313 example, because most workers were told to remain home if they were experiencing COVID-like  
314 symptoms during the pandemic, sickness presenteeism may have been reduced during this period.  
315 However, it is unclear how such instructions affected overall sickness presenteeism, including that  
316 associated with symptoms unrelated to COVID-19. Finally, we did not consider all possible  
317 confounders affecting sickness presenteeism because we did not obtain information on some  
318 confounders, such as job insecurity, annual leave rights, and the culture around employment and sick  
319 leave in each company.

320

## 321 **Conclusion**

322 Interruption to medical care was associated with the occurrence of sickness presenteeism  
323 during Japan's third wave of the COVID-19 pandemic. While the occurrence of sickness  
324 presenteeism largely differed according to symptoms, it may be possible that there were important  
325 cases of sickness presenteeism that were undetectable using the questionnaire. This study  
326 demonstrates the importance of maintaining one's health condition and continuing necessary  
327 treatment even during an infectious disease pandemic.

328

329 **Acknowledgements:**

330           This study was supported and partly funded by research grants from the University of  
331 Occupational and Environmental Health, Japan (no grant number); the Japanese Ministry of Health,  
332 Labour and Welfare (grant numbers H30-josei-ippan-002, H30-roudou-ippan-007, 19JA1004,  
333 20JA1006, 210301-1, and 20HB1004); Anshin Zaidan (no grant number); the Collabo-Health Study  
334 Group (no grant number); and Hitachi Systems, Ltd. (no grant number); and scholarship donations  
335 from Chugai Pharmaceutical Co., Ltd. (no grant number).

336           The current members of the CORoNaWork Project, in alphabetical order, are as follows:  
337 Dr. Yoshihisa Fujino (present chairperson of the study group), Dr. Akira Ogami, Dr. Arisa Harada,  
338 Dr. Ayako Hino, Dr. Hajime Ando, Dr. Hisashi Eguchi, Dr. Kazunori Ikegami, Dr. Kei Tokutsu, Dr.  
339 Keiji Muramatsu, Dr. Koji Mori, Dr. Kosuke Mafune, Dr. Kyoko Kitagawa, Dr. Masako Nagata, Dr.  
340 Mayumi Tsuji, Ms. Ning Liu, Dr. Rie Tanaka, Dr. Ryutaro Matsugaki, Dr. Seiichiro Tateishi, Dr.  
341 Shinya Matsuda, Dr. Tomohiro Ishimaru, and Dr. Tomohisa Nagata. All members are affiliated with  
342 the University of Occupational and Environmental Health, Japan.

343

344 **Disclosure:**

345 Ethics Approval: This study was approved by the ethics committee of the University of Occupational

346 and Environmental Health, Japan (reference No. R2-079 and R3-006).

347 Informed Consent: Informed consent was obtained using a form on the survey website.

348 Registry and the Registration No. of the study/Trial: N/A

349 Animal Studies: N/A

350 Conflict of Interest: None declared.

351

352 References

- 353 1. Aronsson G, Gustafsson K, Dallner M. Sick but yet at work. An empirical study of sickness  
354 presenteeism. *J Epidemiol Community Health*. 2000;54(7):502-509.
- 355 2. Aronsson G, Gustafsson K. Sickness presenteeism: prevalence, attendance-pressure factors, and  
356 an outline of a model for research. *J Occup Environ Med*. 2005;47(9):958-966.
- 357 3. Skagen K, Collins AM. The consequences of sickness presenteeism on health and wellbeing  
358 over time: A systematic review. *Soc Sci Med*. 2016;161:169-177.
- 359 4. Johns G. Presenteeism in the workplace: A review and research agenda. *J Organ Behav*.  
360 2010;31(4):519-542.
- 361 5. Kivimäki M, Head J, Ferrie JE, et al. Working while ill as a risk factor for serious coronary  
362 events: the Whitehall II study. *Am J Public Health*. 2005;95(1):98-102.
- 363 6. Janssens H, Clays E, De Clercq B, De Bacquer D, Braeckman L. The relation between  
364 presenteeism and different types of future sickness absence. *J Occup Health*.  
365 2013;55(3):132-141.
- 366 7. Bergström G, Bodin L, Hagberg J, Aronsson G, Josephson M. Sickness presenteeism today,  
367 sickness absenteeism tomorrow? A prospective study on sickness presenteeism and future  
368 sickness absenteeism. *J Occup Environ Med*. 2009;51(6):629-638.
- 369 8. Gustafsson K, Marklund S. Associations between health and combinations of sickness presence  
370 and absence. *Occup Med* . 2014;64(1):49-55.
- 371 9. Gustafsson K, Marklund S. Consequences of sickness presence and sickness absence on health  
372 and work ability: a Swedish prospective cohort study. *Int J Occup Med Environ Health*.  
373 2011;24(2):153-165.
- 374 10. Schultz AB, Chen C-Y, Edington DW. The cost and impact of health conditions on  
375 presenteeism to employers: a review of the literature. *Pharmacoeconomics*.  
376 2009;27(5):365-378.
- 377 11. Nagata T, Mori K, Ohtani M, et al. Total Health-Related Costs Due to Absenteeism,  
378 Presenteeism, and Medical and Pharmaceutical Expenses in Japanese Employers. *J Occup  
379 Environ Med*. 2018;60(5):e273-e280.
- 380 12. Burton WN, Pransky G, Conti DJ, Chen C-Y, Edington DW. The association of medical

- 381 conditions and presenteeism. *J Occup Environ Med.* 2004;46(6 Suppl):S38-45.
- 382 13. Reuter M, Dragano N, Wahrendorf M. Working while sick in context of regional  
383 unemployment: a Europe-wide cross-sectional study. *J Epidemiol Community Health.*  
384 2021;75(6):574-580.
- 385 14. Tilchin C, Dayton L, Latkin CA. Socioeconomic Factors Associated With an Intention to Work  
386 While Sick From COVID-19. *J Occup Environ Med.* 2021;63(5):363-368.
- 387 15. Kinman G, Grant C. Presenteeism during the COVID-19 pandemic: risks and solutions. *Occup*  
388 *Med* . Published online November 18, 2020. doi:10.1093/occmed/kqaa193
- 389 16. Kinman G. Sickness presenteeism at work: prevalence, costs and management. *Br Med Bull.*  
390 2019;129(1):69-78.
- 391 17. Das AK, Mishra DK, Gopalan SS. Reduced access to care among older American adults during  
392 CoVID-19 pandemic: results from a prospective cohort study. *bioRxiv*. Published online  
393 November 30, 2020. doi:10.1101/2020.11.29.20240317
- 394 18. Czeisler MÉ, Mpp KM, Clarke KEN, et al. Delay or avoidance of medical care because of  
395 COVID-19-related concerns —. doi:10.1101/2020.04.22.20076141v1
- 396 19. van Ballegooijen H, Goossens L, Bruin RH, Michels R, Krol M. Concerns, quality of life,  
397 access to care and productivity of the general population during the first 8 weeks of the  
398 coronavirus lockdown in Belgium and the Netherlands. *BMC Health Serv Res.* 2021;21(1):227.
- 399 20. Lopresti M Seo T Sato. Pandemics and access to care: use of real-world DATA to examine the  
400 IMPACT of COVID - 19 on pharmacy visits in Japan. *Value Health.*  
401 doi:10.1016/j.jval.2020.08.1707
- 402 21. Erol MK, Kayıkçıoğlu M, Kılıçkap M, et al. Treatment delays and in-hospital outcomes in acute  
403 myocardial infarction during the COVID-19 pandemic: A nationwide study. *Anatol J Cardiol.*  
404 2020;24(5):334-342.
- 405 22. Woolf SH, Chapman DA, Sabo RT, Weinberger DM, Hill L. Excess Deaths From COVID-19  
406 and Other Causes, March-April 2020. *JAMA.* 2020;324(5):510-513.
- 407 23. Fujino Y, Ishimaru T, Eguchi H, et al. Protocol for a nationwide Internet-based health survey in  
408 workers during the COVID-19 pandemic in 2020. *bioRxiv*. Published online February 5, 2021.

409           doi:10.1101/2021.02.02.21249309

410   24. Navarro A, Salas-Nicás S, Llorens C, Moncada S, Molinero-Ruíz E, Moriña D. Sickness  
411       presenteeism: Are we sure about what we are studying? A research based on a literature review  
412       and an empirical illustration. *Am J Ind Med.* 2019;62(7):580-589.

413   25. Papke LE, Wooldridge JM. Econometric methods for fractional response variables with an  
414       application to 401(k) plan participation rates. *J Appl Econ.* 1996;11(6):619-632.

415   26. Williams R. Using the Margins Command to Estimate and Interpret Adjusted Predictions and  
416       Marginal Effects. *Stata J.* 2012;12(2):308-331.

417   27. Burton WN, Morrison A, Wertheimer AI. Pharmaceuticals and worker productivity loss: a  
418       critical review of the literature. *J Occup Environ Med.* 2003;45(6):610-621.

419   28. Chudasama YV, Gillies CL, Zaccardi F, et al. Impact of COVID-19 on routine care for chronic  
420       diseases: A global survey of views from healthcare professionals. *Diabetes Metab Syndr.*  
421       2020;14(5):965-967.

422   29. Hansen CD, Andersen JH. Going ill to work--what personal circumstances, attitudes and  
423       work-related factors are associated with sickness presenteeism? *Soc Sci Med.*  
424       2008;67(6):956-964.

425   30. Ishimaru T, Mine Y, Fujino Y. Two definitions of presenteeism: sickness presenteeism and  
426       impaired work function. *Occup Med .* 2020;70(2):95-100.

427



Table 1. Basic characteristics of the study subjects

|                                                         | Total<br>(n=27,036) | Workers who did not<br>require routine medical<br>care<br>(n= 17,526) | Workers who used<br>medical care<br>(n=8,451) | Workers who<br>experienced<br>interrupted medical<br>care<br>(n=1,059) |
|---------------------------------------------------------|---------------------|-----------------------------------------------------------------------|-----------------------------------------------|------------------------------------------------------------------------|
|                                                         | n (%)               | n (%)                                                                 | n (%)                                         | n (%)                                                                  |
| Age, mean (SD)                                          | 47.0 (10.5)         | 45.4 (10.5)                                                           | 50.4 (9.8)                                    | 46.0 (10.2)                                                            |
| Sex, men                                                | 13814 (51.1%)       | 8422 (48.1%)                                                          | 4885 (57.8%)                                  | 507 (47.9%)                                                            |
| Marital status, married                                 | 15029 (55.6%)       | 9627 (54.9%)                                                          | 4894 (57.9%)                                  | 508 (48.0%)                                                            |
| Job type                                                |                     |                                                                       |                                               |                                                                        |
| Mainly desk work                                        | 13468 (49.8%)       | 8545 (48.8%)                                                          | 4440 (52.5%)                                  | 483 (45.6%)                                                            |
| Mainly interpersonal communication                      | 6927 (25.6%)        | 4621 (26.4%)                                                          | 2032 (24.0%)                                  | 274 (25.9%)                                                            |
| Mainly physical work                                    | 6641 (24.6%)        | 4360 (24.9%)                                                          | 1979 (23.4%)                                  | 302 (28.5%)                                                            |
| Equivalent income (Japanese Yen)                        |                     |                                                                       |                                               |                                                                        |
| ≤2500000                                                | 6859 (25.4%)        | 4,374 (25.0%)                                                         | 2,147 (25.4%)                                 | 338 (31.9%)                                                            |
| 2500001-3800000                                         | 7148 (26.4%)        | 4,777 (27.3%)                                                         | 2,119 (25.1%)                                 | 252 (23.8%)                                                            |
| 3800001-5250000                                         | 7002 (25.9%)        | 4,594 (26.2%)                                                         | 2,167 (25.6%)                                 | 241 (22.8%)                                                            |
| >5250000                                                | 6027 (22.3%)        | 3,781 (21.6%)                                                         | 2,018 (23.9%)                                 | 228 (21.5%)                                                            |
| Education                                               |                     |                                                                       |                                               |                                                                        |
| Junior high school                                      | 368 (1.4%)          | 244 (1.4%)                                                            | 107 (1.3%)                                    | 17 (1.6%)                                                              |
| High school                                             | 6953 (25.7%)        | 4381 (25.0%)                                                          | 2284 (27.0%)                                  | 288 (27.2%)                                                            |
| Vocational school, junior college, or technical college | 6544 (24.2%)        | 4378 (25.0%)                                                          | 1913 (22.6%)                                  | 253 (23.9%)                                                            |

|                                                                                                           |                |                |               |             |
|-----------------------------------------------------------------------------------------------------------|----------------|----------------|---------------|-------------|
| University or graduate school                                                                             | 13171 (48.7%)  | 8523 (48.6%)   | 4147 (49.1%)  | 501 (47.3%) |
| Number of employees                                                                                       |                |                |               |             |
| 1                                                                                                         | 2,556 (9.5%)   | 1,625 (9.3%)   | 848 (10.0%)   | 83 (7.8%)   |
| 2-49                                                                                                      | 7,999 (29.6%)  | 5,378 (30.7%)  | 2,320 (27.5%) | 301 (28.4%) |
| 50-999                                                                                                    | 9,703 (35.9%)  | 6,262 (35.7%)  | 3,036 (35.9%) | 405 (38.2%) |
| 1000-9999                                                                                                 | 4,719 (17.5%)  | 2,986 (17.0%)  | 1,552 (18.4%) | 181 (17.1%) |
| ≥10000                                                                                                    | 2,059 (7.6%)   | 1,275 (7.3%)   | 695 (8.2%)    | 89 (8.4%)   |
| Frequency of working from home                                                                            |                |                |               |             |
| Almost zero                                                                                               | 21,276 (78.7%) | 13,944 (79.6%) | 6,484 (76.7%) | 848 (80.1%) |
| At least 1 day a month                                                                                    | 615 (2.3%)     | 370 (2.1%)     | 217 (2.6%)    | 28 (2.6%)   |
| At least 1 day a week                                                                                     | 878 (3.2%)     | 571 (3.3%)     | 277 (3.3%)    | 30 (2.8%)   |
| At least 2 days a week                                                                                    | 1,477 (5.5%)   | 915 (5.2%)     | 501 (5.9%)    | 61 (5.8%)   |
| At least 4 days a week                                                                                    | 2,790 (10.3%)  | 1,726 (9.8%)   | 972 (11.5%)   | 92 (8.7%)   |
| Presence of a policy by the employer requesting that employees refrain from attending work while ill, Yes | 20,230 (74.8%) | 13,057 (74.5%) | 6,484 (76.7%) | 689 (65.1%) |

SD: standard deviation

Table 2. Association between treatment status and sickness presenteeism

| Treatment status                                 | Univariate |           |          | Multivariate* |           |          |
|--------------------------------------------------|------------|-----------|----------|---------------|-----------|----------|
|                                                  | OR         | 95% CI    | <i>p</i> | Adjusted OR   | 95% CI    | <i>p</i> |
| Workers who did not require routine medical care | Reference  |           |          | Reference     |           |          |
| Workers who used medical care                    | 1.57       | 1.47 1.69 | <0.001   | 1.36          | 1.26 1.46 | <0.001   |
| Workers who experienced interrupted medical care | 5.75       | 5.16 6.40 | <0.001   | 3.28          | 2.93 3.67 | <0.001   |

\*Adjusted for sex, age, marital status, equivalent income, education, company size, job type, frequency of working from home, number of days worked per week, presence of a policy by the employer requesting that employees refrain from attending work while ill, cumulative infection rate for COVID-19 in the region of residence, and main symptom.

OR: odds ratio, CI: confidence interval

Table 3. Association between main symptoms and sickness presenteeism

| Main symptom                                                           | Adjusted* OR | 95% CI |      | <i>p</i> |
|------------------------------------------------------------------------|--------------|--------|------|----------|
| No problem                                                             | Reference    |        |      |          |
| Pain                                                                   | 2.76         | 2.46   | 3.10 | <0.001   |
| Movement                                                               | 3.02         | 2.57   | 3.55 | <0.001   |
| Tightness, loss of energy, appetite, fever, dizziness, or feeling poor | 4.53         | 4.05   | 5.06 | <0.001   |
| Toileting or elimination                                               | 2.62         | 2.14   | 3.21 | <0.001   |
| Mental health                                                          | 5.35         | 4.85   | 5.91 | <0.001   |
| Skin, hair, or beauty                                                  | 1.96         | 1.60   | 2.39 | <0.001   |
| Sleep                                                                  | 3.07         | 2.73   | 3.45 | <0.001   |
| Eyes                                                                   | 2.01         | 1.74   | 2.31 | <0.001   |
| Nose                                                                   | 1.54         | 1.09   | 2.17 | 0.014    |
| Ears                                                                   | 2.35         | 1.74   | 3.18 | <0.001   |
| Other                                                                  | 2.58         | 2.22   | 3.00 | <0.001   |

\*Adjusted for sex, age, marital status, equivalent income, education, company size, job type, frequency of working from home, number of days worked per week, presence of a policy by the employer requesting that employees refrain from attending work while ill, cumulative infection rate for COVID-19 in the region of residence, and treatment status.

OR: odds ratio, CI: confidence interval

Table 4. Predictive margins of sickness presenteeism days for each symptom and comparison between each treatment status

|                                                                        | Workers who did not require routine medical care (n=17,526) |      |                     |                | Workers who used medical care (n=8,451) |      |                     |                |            | Workers who experienced interrupted medical care (n=1,059) |      |                     |                |            |
|------------------------------------------------------------------------|-------------------------------------------------------------|------|---------------------|----------------|-----------------------------------------|------|---------------------|----------------|------------|------------------------------------------------------------|------|---------------------|----------------|------------|
|                                                                        | n                                                           | %    | Predictive margins* | Standard error | n                                       | %    | Predictive margins* | Standard error | <i>p</i> † | n                                                          | %    | Predictive margins* | Standard error | <i>p</i> † |
| Total                                                                  | 17526                                                       | 100  | 1.4                 | 0.03           | 8451                                    | 100  | 2.2                 | 0.05           | <0.001     | 1059                                                       | 100  | 6.6                 | 0.25           | <0.001     |
| <b>Main symptom</b>                                                    |                                                             |      |                     |                |                                         |      |                     |                |            |                                                            |      |                     |                |            |
| No problem                                                             | 10938                                                       | 62.4 | 0.8                 | 0.03           | 3642                                    | 43.1 | 0.9                 | 0.03           | 1.000      | 160                                                        | 15.1 | 2.6                 | 0.15           | <0.001     |
| Pain                                                                   | 849                                                         | 4.8  | 2.0                 | 0.10           | 842                                     | 10.0 | 2.5                 | 0.12           | <0.001     | 144                                                        | 13.6 | 6.1                 | 0.33           | <0.001     |
| Movement                                                               | 481                                                         | 2.7  | 2.3                 | 0.16           | 344                                     | 4.1  | 2.8                 | 0.20           | 1.000      | 54                                                         | 5.1  | 6.5                 | 0.44           | 0.42       |
| Tightness, loss of energy, appetite, fever, dizziness, or feeling poor | 715                                                         | 4.1  | 3.4                 | 0.15           | 583                                     | 6.9  | 4.1                 | 0.17           | 0.027      | 133                                                        | 12.6 | 8.9                 | 0.39           | <0.001     |
| Toileting or elimination                                               | 263                                                         | 1.5  | 2.0                 | 0.18           | 201                                     | 2.4  | 2.5                 | 0.23           | 1.000      | 40                                                         | 3.8  | 5.5                 | 0.50           | <0.001     |
| Mental health                                                          | 1143                                                        | 6.5  | 3.8                 | 0.14           | 909                                     | 10.8 | 4.7                 | 0.17           | <0.001     | 219                                                        | 20.7 | 9.9                 | 0.38           | <0.001     |
| Skin, hair, or beauty                                                  | 389                                                         | 2.2  | 1.5                 | 0.14           | 160                                     | 1.9  | 1.9                 | 0.18           | 0.006      | 29                                                         | 2.7  | 4.9                 | 0.44           | 0.513      |
| Sleep                                                                  | 997                                                         | 5.7  | 2.3                 | 0.11           | 637                                     | 7.5  | 2.8                 | 0.14           | 0.127      | 116                                                        | 11.0 | 6.5                 | 0.35           | <0.001     |
| Eyes                                                                   | 795                                                         | 4.5  | 1.5                 | 0.09           | 512                                     | 6.1  | 1.8                 | 0.11           | 0.319      | 65                                                         | 6.1  | 4.3                 | 0.30           | <0.001     |
| Nose                                                                   | 98                                                          | 0.6  | 1.2                 | 0.20           | 71                                      | 0.8  | 1.5                 | 0.25           | 1.000      | 9                                                          | 0.9  | 3.4                 | 0.54           | 1.000      |

|       |     |     |     |      |     |     |     |      |       |    |     |     |      |        |
|-------|-----|-----|-----|------|-----|-----|-----|------|-------|----|-----|-----|------|--------|
| Ears  | 80  | 0.5 | 1.7 | 0.25 | 84  | 1.0 | 2.2 | 0.30 | 1.000 | 12 | 1.1 | 5.7 | 0.73 | 0.056  |
| Other | 778 | 4.4 | 2.0 | 0.13 | 466 | 5.5 | 2.5 | 0.17 | 0.031 | 78 | 7.4 | 6.3 | 0.41 | <0.001 |

\*predictive margins: mean predicted number of sickness presenteeism days for each symptom and treatment status using the model in Table 2 and 3 with substitution of measured values for other covariates (adjusted using the Bonferroni method); calculated using the formula: mean predicted fraction  $\times$  30 (days)

† *p*-value for simple main effects for each treatment status compared to workers who did not require routine medical care using a model that included the interaction term for treatment status and main symptoms (adjusted using the Bonferroni method)

%: proportion of the total number of respondents for each treatment status

431

432

433 Figure 1. Number of days of sickness presenteeism among workers with each treatment status

434

435 (Figure 1)

436

437

438 Figure 2. Predictive margins with 95% confidence intervals for each treatment status and symptom

439

440 (Figure 2)

441

442 \*others include loss of energy, appetite, fever, dizziness, or feeling poor

443 †Error bars indicate 95% confidence intervals

444



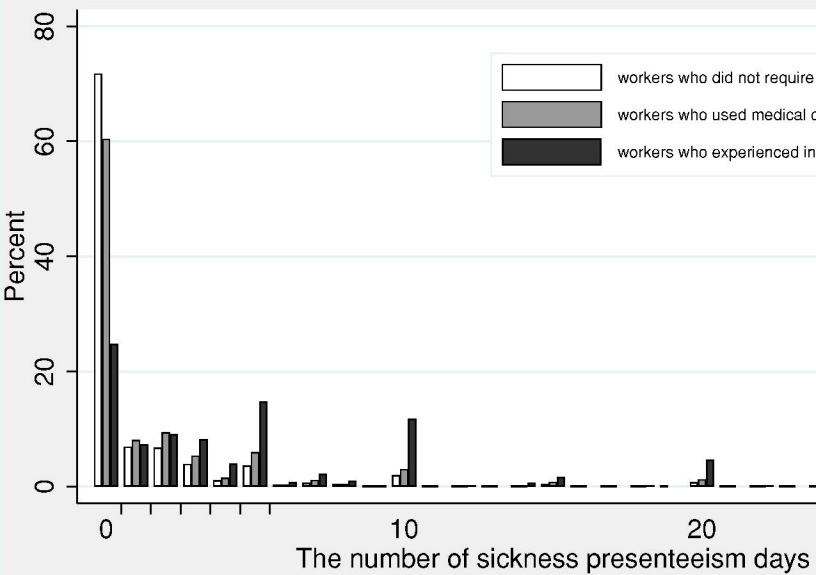

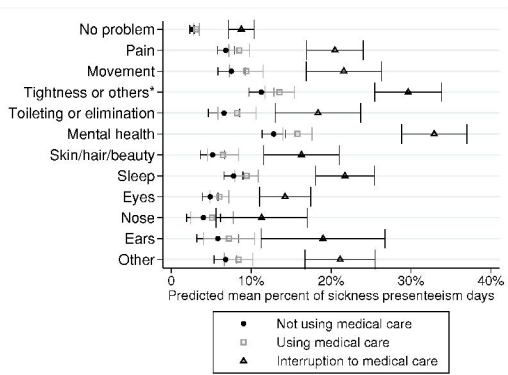

Source: http://medrxiv.org/content/10.1101/2021.08.14.21261996v4.full.pdf
